# Supplementary material
Source: Springer Nature journal article supplement (https://www.springermedizin.de/resource/supplementary/12943_2013_1128_MOESM2_ESM.pdf/9552580)

**HOK**

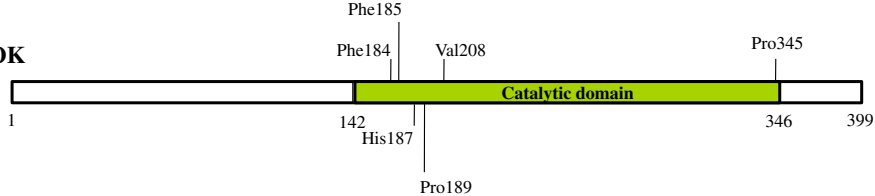

**OEEM-1**

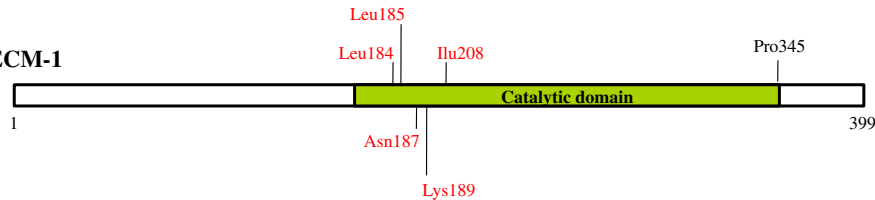

**HSC-3**

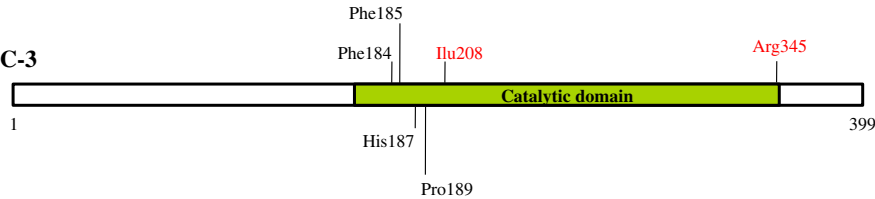

Supplement: MOESM2 [file 9552580]
